# Supplementary material for: Next-generation ice nucleating particle sampling on aircraft: Characterization of the High-volume flow aERosol particle filter sAmpler (HERA)
Source: Copernicus journal article supplement (doi:10.5194/amt-2023-88), 2023-05-08
Supplement: Supplementary file [file amt-2023-88-AC2-supplement.pdf]

## **Author response to comments by Referee #2:**

We thank the referee for taking her/his time to review our manuscript and for her/his helpful comments and recommendations. Even though publication of the first manuscript version was not recommended, we hope that the referee reconsiders after reviewing our adjustments. Since HERA is currently revised and not available for further experimentation, we could not perform additional measurements as requested. However, we included more elaborate descriptions of the experimental setups, clarified particle losses in the actual CIRRUS-HL campaign setup, and estimated measurement uncertainty due to differences in aspiration efficiency when instruments were not sampling from a common inlet.

In the following, we address the referee comments and describe our adjustments in detail. For this, the referee comments are given in blue and our answers in black. When referencing page, line, and section numbers, we always refer to the first version of the manuscript, unless otherwise stated.

---

The manuscript describes an automated 6-filter sampling system (called HERA) for collecting atmospheric ice nucleating particles (INPs) for offline immersion freezing analysis. Results are presented for HERA at relatively modest flow rates (~40 L/min) for laboratory INPs (Arizona Test Dust, SNOMAX), ambient ground sampling, and airborne measurements on the HALO. Samples were collected alongside the HALFBAC single-filter holder, which was designed for balloon-borne observations. The experimental design for validating aspects of the HERA system in some cases does not seem particularly well posed. For example, the effort to characterize the collection efficiency across varying filter pore sizes focuses on offline filter extraction and immersion freezing INP measurements, which have their own sources of uncertainty. Quantifying size-dependent filtration efficiency of large particles could've been more straightforwardly accomplished by using a size classifier and particle counters. Similarly, the theoretical calculations of particle transmission efficiency focus on the relatively short transport tube lengths within the sampler, but neglect the important aircraft inlet and long tube lengths that are going to be the limiting factors. Overall, the manuscript is well written albeit quite long. The topic is relevant for Atmospheric Measurement Techniques. While I do see some value in having an instrument paper to describe a specific airborne instrument, I'm struggling to identify what is novel in this work or, at least, of utility to the community with regard to airborne filter sampling. Consequently, I can't recommend the paper for publication, unless substantial efforts are made to deepen the level of characterization and analysis with regard to the HERA system itself.

We agree with the referee that there are alternatives to the here presented quantification of the collection efficiency via immersion freezing measurements. We opted for this method, since HERA is first and foremost used for the collection of INPs. The comprehensive examination of INP sampling onto filters, extraction of INPs from the filter material, and immersion freezing measurements of the filter extract is the typical HERA use case. We are aware of the fact, that the immersion freezing measurements have their own uncertainties

(which are discussed in the manuscript, see p. 8, l. 195-198) and hence compared our results to published data, where good agreement was found. We included the following in Sec. 3.2 to clarify the reasoning behind our approach: “In order to verify the theoretical particle transmission efficiencies for different particle sizes and flow rates, laboratory experiments with test substances were performed. This was done via immersion INP filter analysis, which is the typical HERA use case.”

Concerning the transmission efficiency calculations, we intended to strictly separate the instrument itself from the inlet and tubing, as the latter change with different campaign setups. However, we understand the request to give an example to communicate transmission efficiencies for installation of HERA on aircraft. We now include new calculations representing the CIRRUS-HL inlet and tubing setup in Sec. 4, together with the results from the aircraft filter sampling, in addition to the “HERA-only” calculations in Fig. 2.

Concerning the innovation of the new HERA system, we feel that we have described improvements compared to typically used methods in detail in the introduction (high degree of automation, no more manual filter handling, active pump control, flow rate exceeding 100 L/min and with that significantly higher spatial resolution than other systems, p. 4, l. 102-108). These technical advancements have already generated interest and request for more HERA systems from the INP community, showing the high degree of innovation. Furthermore, referee #1 judged the scientific significance as “excellent”.

#### Specific Comments:

What aspects of the HERA make it "next generation"? Frankly, it seems like a pretty straightforward, moderate-flowrate (40 L/min), filter sampler, albeit with multiple cartridges instead of one.

Please refer to our statement concerning the innovation of the HERA system given above. HERA can be used for filter sampling at flow rates up to 120 L/min at near-standard pressure conditions (now included in Sec. 3.1) which is way above any other filter sampling setup described in the literature (highest flow rate 50 L/min given by Flyger et al., 1973, see p. 4, l. 94-95). The flow rate of 40 L/min during CIRRUS-HL was restricted due to the amount of other instruments sampling from the same line. We added the following to Sec. 5: “Setups for past campaigns have been, and upcoming ones will continue to be, planned in such a manner that sampling flow rates are maximized and hence temporal and spatial resolution of retrieved INP concentrations further increased.”

Pg. 5, Line 155: "adapt the sample flow velocity to the wind speed". This doesn't read quite right. Suggest instead something like "match the inlet face velocity to the velocity of the surrounding air (often represented as the aircraft true air speed or for stationary sampling, wind speed)"

The sentence was changed according to the suggestion.

Figure 1 is very busy and shows a lot of unrelated information. Suggest combining the HALO aircraft diagram (panel a) with Figure 2 as it adds little value about the actual HERA

instrument itself and splitting panels b and c into separate figures that are large enough to be legible. Additional labels on the filter holder cross-section, would be valuable -- what is the orange shaded region?

We considered combining Fig. 1 a) with Fig. 2 but decided against it because Fig 1 a) is meant as a schematic to introduce possible installation of HERA on aircraft, not as a to-scale sketch of sampling lines relating to transmission efficiency calculations (now included in Sec. 4). We appreciate the remark about splitting Fig. 1 b) in two and including labels for the cross section (see new Fig. 1 b and c). The old Fig. 1 c), i.e., the cold stage setups and measurement examples, were removed to concentrate on the sampling, not the filter analysis.

Following up on the previous comment, I would think that the most important sampling transmission concerns would be from the inlet(s) and long lengths of transport tubing, which Figure 2 and related discussion do not account for. This is a flaw, and Figure 2 is currently somewhat misleading in only accounting for the very short tube lengths within the instrument itself. Please include the inlet aspiration efficiency for the isokinetic and CVI inlets in the calculations as well as a rough transport tubing length. I suspect that the inflection point in Figure 2 will be shifted dramatically toward smaller sizes than what is presented now.

We understand the concern. Since Sec. 2 focuses on the instrument itself, we would like to avoid including the particle loss calculations for a specific measurement campaign there. As a compromise, we included information concerning the transmission efficiency during CIRRUS-HL in Sec. 4 in written form. The  $D_{50}$  values at the HASI and HALO-CVI are  $2.7 \mu\text{m}$  and  $2.2 \mu\text{m}$ , respectively (see figure below). Section 4 now also contains information about the rough sampling line geometries and other parameters used for the calculations. Sec. 2.2 still focuses on the discussion of the "HERA-only" transmission efficiency (which we feel is important information, too) and refers to Sec. 4.

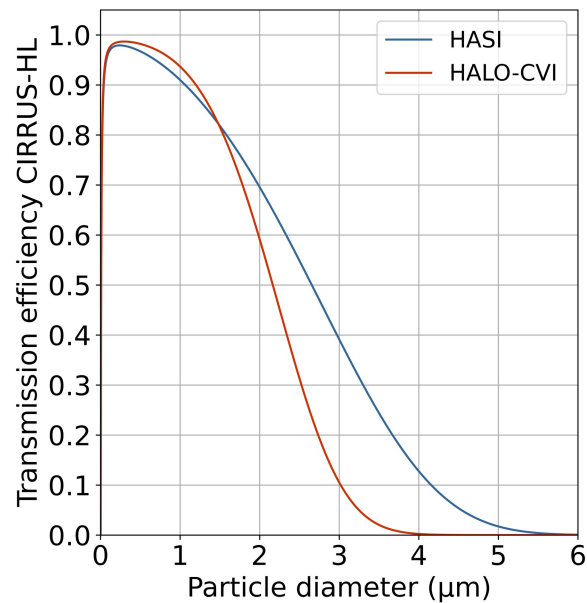

The  $D_{50}$  for sampling at the HASI given above includes aspiration effects in the inlet. Concerning the HALO-CVI, however, it is not possible to include its aspiration efficiency into the tube transmission calculations. The reason is that the aspiration efficiency is related to cloud droplets and/or ice particles, whereas the tubing transmission efficiency is related to the dry cloud particle residuals, which are then sampled with HERA. These are totally different diameter regimes, which cannot be treated in the same calculation as a function of particle diameter. Similar to other CVI systems on fast flying aircraft, the design of HALO-CVI allows a lower cut-size of 5  $\mu\text{m}$  (e.g., Twohy and Poellot, 2005). The upper cut size is given by the distance to stop and sublimate larger cloud particles in comparison to the inlet geometry (Czizco and Froyd, 2014). This limits the sampling without wall contact to cloud particles smaller 60  $\mu\text{m}$  (Seifert et al., 2004). Thus, one can proceed from the assumption that residual particles from cloud particles in the size range of 5  $\mu\text{m}$  to 60  $\mu\text{m}$  leave the HALO-CVI inlet without losses from where the particle transmission calculations to HERA are carried out. While this is important information, we feel that including it in the manuscript is beyond the scope of the present study. The size range of collected cloud particles with the corresponding references is now included in Sec. 4.

Pg. 7, Line 181: How long does it take to remotely switch between the filters? Closer to a second is fast, but closer to a minute is not particularly fast for aircraft sampling.

The first version of HERA included a positioning system connected to the ball valve which would work reliably only when turned into one direction. This meant that the next filter holder in turning direction could be reached within  $\sim 10$  s, but the previous filter holder in  $\sim 60$  s. Now, HERA is being revised so that the positioning is accurate even when the motor is running in reverse. Furthermore the turning speed is increased. Since this new version will be in operation in the near future, we revised the time for switching to  $< 30$  s.

### Section 2.3: Can filters be swapped out in-flight in order to sample more than 6 filters?

In principle, this is possible. The filter holder inset would have to be disconnected from the sampling line in-flight, removed, and the filter holders replaced with “fresh” ones. Alternatively, a second filter holder inset (complete with filter holders, ball valves and motor drive) could be brought on board and be exchanged in-flight, which would be faster. However, this is not possible on HALO due to certification regulations. Frankly, the number of filter holders was discussed in detail prior to the construction of HERA and so far 6 filters per flight have proven to be an appropriate number in practice. It is true that one has to think very carefully about meaningful sampling intervals prior to takeoff and in-flight, but this also holds true in case of more available filters. Based on suggestions from referee #1, we have rewritten the paragraph concerning sampling strategy in Sec. 2.3 and included the information above.

Pg. 7, Line 189: The paper seems to shift at this point away from the HERA operation to discussion of offline analyses of the filter extracts. This should be a new section.

The description of the offline immersion freezing analysis was shifted to the Appendix to make it easily available to the reader but not to distract from the information about sampling.

Pg. 8, Lines 207-215: Do these reported 1-minute and 10-minute sampling time recommendations correspond to a filter flow rate of 40 L/min. Could a higher flow rate be used?

Yes, these periods refer to a sample flow rate of 40 L/min, as stated in the caption of Fig. 3 and on p. 8, l. 202. This flow rate was chosen for the calculation as it was used during CIRRUS-HL, which is a recurring example in our manuscript. Yes, a higher flow rate could be used, as the pump unit is able to generate up to 150 L/min for undisturbed standard conditions. The actual flow rate through the filter depends mostly on the filter medium and the ambient pressure (see comment on p. 7 of this document). More information on this is now included in Sec. 3.1, where the effect of filter pore size is discussed.

Pg. 10, Line 250: Now the flow rate is 15 L/min. Does this change the filter collection efficiency?

A higher flow rate will increase the collection efficiency. This is discussed on p. 11, l. 275. The flow rate of 15 L/min was chosen for practical reasons, i.e., to allow for prolonged sampling through 0.2  $\mu\text{m}$  pore size filters with the battery-powered HALFBAC. A higher flow rate would have led to a significantly higher power consumption. This was added to the manuscript in Sec. 3.1.

Pg. 10, Line 255: Why 15 minutes? This strikes me as quite a long time for each filter.

This is our established method. In earlier tests, the time period of 15 min proved to remove the overall majority of particles from polycarbonate filters, except for some hydrophobic soot aggregates. This was investigated by examining a sampled filter via scanning electron microscopy prior to washing and again after washing and drying. The optimal filter washing/rinsing time most likely depends on the vessel, volume of washing water, and the

type of shaker used. In the literature, time periods of, e.g., 3 min (Jakobsson et al., 2022), 20 min (e.g., McCluskey et al., 2017), and 1 h (e.g., Adams et al., 2020) are reported. We feel that an elaborate discussion of filter washing times is out of the focus of our study and did not change anything in the manuscript.

Pg. 10, Line 268: Why would there be differences in aspiration efficiency? Where the inlets and flow rates meaningfully different?

In this case, the inlets and flow rates were exactly the same, as described on p. 10, l., 248-250. However, variations in wind speed and direction could have affected both HALFBACs to different degrees during the rooftop sampling and influenced the overall sampling efficiency to different degrees. This was now added to Sec. 3.1. Furthermore, we now refer to Sec. 3.3, where the effect of variations in wind speed and direction on the sampling efficiency are estimated.

Pg. 14, Lines 341-342: Strike the sentence "In conclusion..." as I don't think a statement with this level of strength or clarity is appropriate to summarize what are rather messy experimental data.

In this case, we do not agree with the referee. In our opinion, the sentence in question is an appropriate summary of the sampling experiments with ATD. We do not see how the data could be interpreted as "messy" when good agreement between all sampled particle sizes at all different flow rates was found. Furthermore, our data agree with published literature data. All of this implies, that no noticeable loss of submicron ATD particles occurred and that the sampled particles were available to nucleate ice in the offline immersion freezing experiments. Nothing was changed.

Pg. 15, Lines 368-369: Strike the sentence, "From this...". The attribution of observational differences solely to differences in aspiration efficiency is speculative.

We now included additional information about the variable aspiration efficiency of HALFBAC (see comment below). According to this, the sentence was changed to: "In summary, INP concentrations and thus INP sampling efficiencies agree within measurement uncertainty for the sampling periods that presumably did not feature significant differences in sampling efficiency between HERA and HALFBAC."

Section 3: The Particle Loss Calculator can be used to compute inlet aspiration losses. Given the reported (relatively low wind speeds), what is a reasonable discrepancy associated with differences in the inlet aspiration? This could be used to uncertainties to the data in Figure 4 and Figure 7.

As suggested, aspiration and transmission efficiencies were calculated for the sampling experiments with HERA and HALFBAC (see figures below). The left plot shows the sampling efficiency at a constant wind speed of 1.7 m/s (same as mean wind speed during sampling periods 4 and 5) with variable aspiration angle of 0° (inlet facing wind directly) to 90° (inlet facing wind at 90°). Solid lines represent HALFBAC (½ inch inlet), dashed lines HERA (¾ inch inlet). The right plot shows the sampling efficiency at a constant aspiration angle of 0° with

variable wind speed ranging from 1 m/s to 3 m/s. In general, HERA samples particles with diameters ranging from 0 to ~8  $\mu\text{m}$ , which comprises the vast majority of the urban background aerosol particle population (see measurements by Mordas et al., 2015), more efficiently than HALFBAC for the given parameters. It can be seen that an increase in aspiration angle and a decrease in wind speed cause particles to be sampled less efficiently with HALFBAC. At constant wind speed,  $D_{50}$  shifts from 7.3  $\mu\text{m}$  to 5  $\mu\text{m}$  with a change in aspiration angle from 0° to 60° (see left plot). If the inlet is facing into the wind (aspiration angle = 0°),  $D_{50}$  is shifted from 10.4  $\mu\text{m}$  (3 m/s) to 5.8  $\mu\text{m}$  (1 m/s). The sampling periods with the largest discrepancies in INP concentration between HERA and HALFBAC (periods 3, 4, and 5) are also the ones with the lowest wind speed and the strongest variability in wind direction, and could thus be the periods with the least efficient sampling with HALFBAC. This information is now included in Sec. 3.3. It is not possible to derive implications of the described effects on the measured INP concentrations since the overall aerosol particle size distribution, let alone the size distribution of the INPs, is not known.

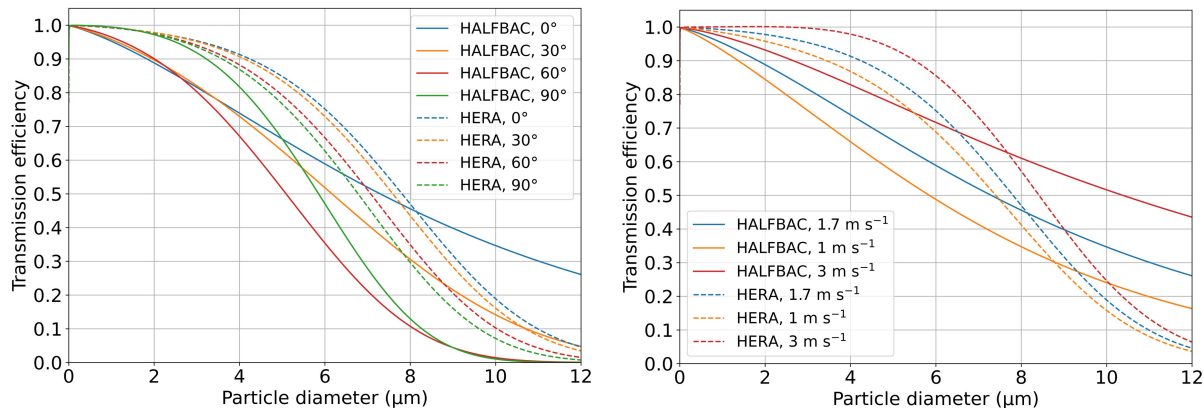

Page 16, Line 381: What was the inlet tip diameter? What was a typical total air flow rate?

The inlet tip is 8.82 mm in diameter, the total air flow varied with TAS, e.g., ~73 L/min at 200 m/s (~11 km flight altitude). This was now added in Sec. 4.

Page 16, Lines 383-384: If the CVI flow was only 5 L/min and HERA was pulling 40 L/min, where did the makeup air flow come from?

Due to its operation mode and geometry, the HALO-CVI only allows for a limited total flow which is made up of sample and supply flow. The sample flow (~ 11 L/min) is then distributed to a number of instruments, and HERA received 5 L/min. Since particles are enriched in the inlet, the lower flow rate will not strongly influence the probability to sample INPs. We added the following to Sec. 4: “ The volumetric flow rate of HERA at the HALO-CVI was ~5 L/min which is due to the inlet-specific restriction of total flow rate. However, since cloud particles and hence residuals are enriched in the HALO-CVI, the lower flow rate does not decrease the probability to collect INPs in comparison to sampling at the HASI.”

Page 18, Lines 416-418: Were such high flow rates investigated during this work? I would think that that would be very useful! What is the maximum flow rate for the 800-micron filters?

HERA was used for sampling SNOMAX and ATD onto 0.8  $\mu\text{m}$  pore size filters at a flow rate of 100 L/min as described in detail in Sec. 3.2 (comparison of sampling efficiency at 10, 40, and 100 L/min, see Fig. 5 and 6). In these experiments, the pump unit was running at  $\sim 80\%$  of the maximum speed at standard pressure. Performance tests showed that just under 150 L/min would be possible at standard pressure through 0.8  $\mu\text{m}$  pore size filters if the pumps are completely maxed out, which is not recommended for a prolonged time period. 120 L/min are more realistic. At low pressure (200 mbar) the pump speed increases by  $\sim$ factor 2 compared to standard pressure, i.e., in this case 60 L/min can still be achieved. Note that the use of high flow rates at low pressure can lead to a disintegration of the filter material as observed for 0.2  $\mu\text{m}$  pore size filters at 40 L/min and 200 mbar (see p.9, l.232-233). This issue was not observed for 0.8  $\mu\text{m}$  pore size filters sampled at 40 L/min. A short version of this was now added to Sec. 3.1.

Page 18, Line 419: I am skeptical that a 7 micron particle can be efficiently sampled through an aircraft inlet and actually make it to the filter to be collected. Please provide information about particle collection efficiency that would be expected for the deployment of HERA on the HALO for CIRRUS-HL.

See adaptations in Sec. 2.2 and 4. Here we adjusted the sentence in question in the following way: "The system was designed for efficient sampling of supermicron particles at high flow rates (particle transmission in HERA:  $D_{50} = 7 \mu\text{m}$  at 40 L/min and near-standard pressure, exemplary particle transmission including aircraft inlet and sampling lines:  $D_{50} = 2.7 \mu\text{m}$  at 40 L/min and 340 mbar)."

Page 19, Line 427-428: First, how do these findings suggest efficient sampling of INPs? Second, what might cause alteration of the particles' immersion freezing properties? What has been ruled out?

1) Our results compare well with data from the literature which was retrieved from direct measurements of SNOMAX® and ATD suspensions. This means, that a similar number of INPs per mass/surface area is found in those suspensions and in the filter extracts from our sampling experiments. If INPs would be lost during sampling with HERA, this would result in a lower number of INPs per mass/surface area in comparison to the literature values. We added these explanations in Sec. 3.2, so that the statement about "efficient INP sampling" in the summary should no longer bring up any questions.

2) For example, the particles' immersion freezing properties might be altered by impaction on the filter (disintegration, making more/other surface sites available). Storage of the filters could also lead to a change in immersion freezing properties. These issues have not been ruled out directly, but indirectly by comparing to results from the literature. The sentence has been altered to include the mentioned processes.



Section 3.3, Pg. 19, Line 432-433: Since the confounding results are due to a flaw in the experimental design, could the experiment be redone so that both instruments are sampling from a common inlet?

As stated earlier, unfortunately we cannot perform additional experiments as HERA is currently being revised. By adding additional information concerning the potential effect of differences in aspiration efficiency on the collection efficiency of INPs and the results obtained during the PICNIC campaign (Lacher et al., 2023) in Sec. 3.3, we hope to have discussed potential reasons for the discrepancies in  $N_{\text{INP}}$  of HERA and HALFBAC in sufficient detail.

Appendix A: I don't understand the need for this section and suggest that it be removed. Much of the discussion seems to be focused on some experiments with SNOMAX to assess the contribution of any leaks when the system is operating at the same pressure as its surroundings, and it is found that the system was not leaking. For the aircraft campaign, where the differential pressure between the cabin and the system can be significant, the manuscript merely notes that leaks are avoided by leak testing the system at low vacuum and that any transient leaks would be identified in flight.

Appendix A was removed and the part about leak testing in the laboratory shifted to Sec. 4.

#### References:

Adams, M. P., Tarn, M. D., Sanchez-Marroquin, A., Porter, G. C. E., O'Sullivan, D., Harrison, A. D., Cui, Z., Vergara-Temprado, J., Carotenuto, F., Holden, M. A., Daily, M. I., Whale, T. F., Sikora, S. N. F., Burke, I. T., Shim, J.-U., McQuaid, J. B., and Murray, B. J.: A Major Combustion Aerosol Event Had a Negligible Impact on the Atmospheric Ice-Nucleating Particle Population, *Journal of Geophysical Research: Atmospheres*, 125, e2020JD032938, <https://doi.org/10.1029/2020JD032938>, 2020.

Cziczo, D. J., & Froyd, K. D. (2014). Sampling the composition of cirrus ice residuals. *Atmospheric Research*, 142, 15-31.

Flyger, H., Hansen, K., Megaw, W. J., and Cox, L. C.: The Background Level of the Summer Tropospheric Aerosol Over Greenland and the North Atlantic Ocean, *Journal of Applied Meteorology and Climatology*, 12, 161–174, [https://doi.org/10.1175/1520-0450\(1973\)012<0161:TBLOTS>2.0.CO;2](https://doi.org/10.1175/1520-0450(1973)012<0161:TBLOTS>2.0.CO;2), 1973.

Jakobsson, J. K. F., Waman, D. B., Phillips, V. T. J., and Bjerring Kristensen, T.: Time dependence of heterogeneous ice nucleation by ambient aerosols: laboratory observations and a formulation for models, *Atmospheric Chemistry and Physics*, 22, 6717–6748, <https://doi.org/10.5194/acp-22-6717-2022>, 2022.

Lacher, L., Adams, M. P., Barry, K., Bertozzi, B., Bingemer, H., Boffo, C., Bras, Y., Büttner, N., Castarede, D., Cziczo, D. J., DeMott, P. J., Fösig, R., Goodell, M., Höhler, K., Hill, T. C. J., Jentzsch, C., Ladino, L. A., Levin, E. J. T., Mertes, S., Möhler, O., Moore, K. A., Murray, B. J., Nadolny, J., Pfeuffer, T., Picard, D., Ramírez-Romero, C., Ribeiro, M., Richter, S., Schrod, J.,

Sellegri, K., Stratmann, F., Swanson, B. E., Thomson, E., Wex, H., Wolf, M., and Freney, E.: The Puy de Dôme ICe Nucleation Intercomparison Campaign (PICNIC): Comparison between online and offline methods in ambient air, *EGUsphere* [preprint], <https://doi.org/10.5194/egusphere-2023-1125>, 2023.

McCluskey, C. S., Hill, T. C. J., Malfatti, F., Sultana, C. M., Lee, C., Santander, M. V., Beall, C. M., Moore, K. A., Cornwell, G. C., Collins, D. B., Prather, K. A., Jayarathne, T., Stone, E. A., Azam, F., Kreidenweis, S. M., & DeMott, P. J. (2017). A Dynamic Link between Ice Nucleating Particles Released in Nascent Sea Spray Aerosol and Oceanic Biological Activity during Two Mesocosm Experiments, *Journal of the Atmospheric Sciences*, 74(1), 151-166. <https://doi.org/10.1175/JAS-D-16-0087.1>

Mordas, G., Prokopciuk, N., Byčenkienė, S., Andriejauskienė, J., & Ulevicius, V. (2015). Optical properties of the urban aerosol particles obtained from ground based measurements and satellite-based modelling studies. *Advances in Meteorology*, 2015.

Seifert, M., Ström, J., Krejci, R., Minikin, A., Petzold, A., Gayet, J.-F., Schlager, H., Ziereis, H., Schumann, U., and Ovarlez, J.: Aerosol-cirrus interactions: a number based phenomenon at all?, *Atmos. Chem. Phys.*, 4, 293–305, <https://doi.org/10.5194/acp-4-293-2004>, 2004.

Twohy, C. H. and Poellot, M. R.: Chemical characteristics of ice residual nuclei in anvil cirrus clouds: evidence for homogeneous and heterogeneous ice formation, *Atmos. Chem. Phys.*, 5, 2289–2297, <https://doi.org/10.5194/acp-5-2289-2005>, 2005.
